# Supplementary material for: Bystro: rapid online variant annotation and natural-language filtering at whole-genome scale
Source: Genome Biol. 2018 Feb 6;19:14. doi: 10.1186/s13059-018-1387-3 (PMC5801807; doi:10.1186/s13059-018-1387-3)
Supplement: Supplementary file 6 — Bystro vs SnpEff annotation comparison details. (XLSX 62 kb) [file 13059_2018_1387_MOESM6_ESM.xlsx]

## Sheet: Bystro vs SnpEff
Yen et al's SnpEff data provides only a single (apparently most significant) effect. We therefore have limited resolution for less-prioritized effects
Bystro does not provide a "splice region" annotation; will simply annotate exonic or intronic when not in spliceDonor or spliceAcceptor
Yen et al chrid	chrom	pos	type	discordant	alt	refSeq.siteType	refSeq.exonicAlleleFunction	Yen et al snpeff_impact	Bystro match	Mathc %
chr1:5935162A>T	chr1	5935162	SNP	0	T	spliceAcceptor;spliceAcceptor;spliceAcceptor;spliceAcceptor	!	splice_acceptor_variant&intron_variant	TRUE	1
chr1:46655125CTCAC>C	chr1	46655126	DEL	0	-4	intronic;intronic;intronic;intronic;intronic;intronic;intronic|intronic;intronic;intronic;intronic;intronic;intronic;intronic|spliceDonor;spliceDonor;spliceDonor;spliceDonor;spliceDonor;spliceDonor;intronic|spliceDonor;spliceDonor;spliceDonor;spliceDonor;spliceDonor;spliceDonor;intronic	!|!|!|!	splice_region_variant&intron_variant	TRUE
chr1:68912523TGAGCCAGAG>T	chr1	68912524	DEL	0	-9	exonic|exonic|exonic|exonic|exonic|exonic|exonic|exonic|exonic	indel-nonFrameshift|indel-nonFrameshift|indel-nonFrameshift|indel-nonFrameshift|indel-nonFrameshift|indel-nonFrameshift|indel-nonFrameshift|indel-nonFrameshift|indel-nonFrameshift	inframe_deletion	TRUE
chr1:68912526GCCAGAG>G	chr1	68912527	DEL	0	-6	exonic|exonic|exonic|exonic|exonic|exonic	indel-nonFrameshift|indel-nonFrameshift|indel-nonFrameshift|indel-nonFrameshift|indel-nonFrameshift|indel-nonFrameshift	inframe_deletion	TRUE
chr1:109817590G>T	chr1	109817590	SNP	0	T	UTR3	!	3_prime_UTR_variant	TRUE
chr1:145597475GAAGT>G	chr1	145597476	DEL	0	-4	intronic;intronic;intronic;intronic;intronic;intronic;intronic|intronic;intronic;intronic;intronic;intronic;intronic;intronic|intronic;intronic;intronic;intronic;intronic;intronic;intronic|intronic;intronic;intronic;intronic;intronic;intronic;intronic	!|!|!|!	intron_variant	TRUE
chr1:153791300CTG>C	chr1	153791301	DEL	0	-2	exonic|exonic	indel-frameshift|indel-frameshift	frameshift_variant	TRUE
chr1:156108541G>GG	chr1	156108541	INS	0	+G	intronic;exonic;exonic;exonic;exonic|intronic;exonic;exonic;exonic;exonic	!;indel-frameshift;indel-frameshift;indel-frameshift;indel-frameshift|!;indel-frameshift;indel-frameshift;indel-frameshift;indel-frameshift	frameshift_variant	TRUE
chr1:161279695T>A	chr1	161279695	SNP	0	A	exonic;exonic	startLoss;startLoss	initiator_codon_variant	TRUE
chr1:226125468G>A	chr1	226125468	SNP	0	A	exonic;exonic	synonymous;synonymous	synonymous_variant	TRUE
chr10:89623035CGCA>C	chr10	89623036	DEL	0	-3	UTR5|UTR5|UTR5	!|!|!	5_prime_UTR_variant	TRUE
chr11:62457852C>A	chr11	62457852	SNP	0	A	ncRNA;ncRNA;ncRNA;exonic;exonic;exonic;exonic;UTR3	!;!;!;nonSynonymous;nonSynonymous;nonSynonymous;nonSynonymous;!	missense_variant	TRUE
chr11:108178710A>AT	chr11	108178710	INS	0	+T	exonic;exonic;exonic;exonic|exonic;exonic;exonic;exonic	indel-frameshift;indel-frameshift;indel-frameshift;indel-frameshift|indel-frameshift;indel-frameshift;indel-frameshift;indel-frameshift	frameshift_variant&splice_region_variant	TRUE
chr11:111735981G>A	chr11	111735981	SNP	0	A	intronic;intronic;intronic;intronic;intronic;intronic;intronic	!	splice_region_variant&intron_variant	TRUE
chr12:22018712TC>T	chr12	22018713	DEL	0	-1	intronic;intronic	!	intron_variant	TRUE
chr12:52912946T>C	chr12	52912946	SNP	0	C	spliceAcceptor;spliceAcceptor	!	splice_acceptor_variant&intron_variant	TRUE
chr12:103234292TC>T	chr12	103234293	DEL	0	-1	exonic;exonic	indel-frameshift;indel-frameshift	frameshift_variant&splice_region_variant	TRUE
chr12:103311124T>C	chr12	103311124	SNP	0	C	UTR5;UTR5	!	5_prime_UTR_variant	TRUE
chr12:111064166G>A	chr12	111064166	SNP	0	A	spliceAcceptor;spliceAcceptor;spliceAcceptor;spliceAcceptor;spliceAcceptor;spliceAcceptor;spliceAcceptor;spliceAcceptor;spliceAcceptor;spliceAcceptor	!	splice_acceptor_variant&intron_variant	TRUE
chr12:123738430CA>C	chr12	123738431	DEL	0	-1	exonic;exonic;exonic	indel-frameshift;indel-frameshift;indel-frameshift	frameshift_variant	TRUE
chr13:31789169CT>C	chr13	31789170	DEL	0	-1	intronic	!	intron_variant	TRUE
chr14:62187287G>A	chr14	62187287	SNP	0	A	exonic;exonic;exonic;exonic;intronic	nonSynonymous;nonSynonymous;nonSynonymous;nonSynonymous;!	missense_variant	TRUE
chr14:62188231TT>GA	chr14	62188231	MNP	0	G	exonic;exonic;exonic;exonic;intronic	nonSynonymous;nonSynonymous;nonSynonymous;nonSynonymous;!	missense_variant	TRUE
chr14:62188231TT>GA	chr14	62188232	MNP	0	A	exonic;exonic;exonic;exonic;intronic	nonSynonymous;nonSynonymous;nonSynonymous;nonSynonymous;!	missense_variant	TRUE
chr15:42680000CA>C	chr15	42680001	DEL	0	-1	exonic;exonic;exonic;exonic;exonic;exonic	indel-frameshift;indel-frameshift;indel-frameshift;indel-frameshift;indel-frameshift;indel-frameshift	frameshift_variant	TRUE
chr15:42680000CA>CAA	chr15	42680000	INS	0	+A	exonic;exonic;exonic;exonic;exonic;exonic|exonic;exonic;exonic;exonic;exonic;exonic	indel-frameshift;indel-frameshift;indel-frameshift;indel-frameshift;indel-frameshift;indel-frameshift|indel-frameshift;indel-frameshift;indel-frameshift;indel-frameshift;indel-frameshift;indel-frameshift	frameshift_variant	TRUE
chr15:48782203C>T	chr15	48782203	SNP	0	T	exonic	nonSynonymous	missense_variant	TRUE
chr15:72105929CC>C	chr15	72105930	DEL	0	-1	exonic;exonic	indel-frameshift;indel-frameshift	frameshift_variant	TRUE
chr15:89873415G>A	chr15	89873415	SNP	0	A	exonic;exonic	nonSynonymous;nonSynonymous	missense_variant	TRUE
chr16:2103394C>T	chr16	2103394	SNP	0	T	exonic;exonic;exonic;exonic;exonic;exonic;intronic;intronic;exonic	nonSynonymous;nonSynonymous;nonSynonymous;nonSynonymous;nonSynonymous;nonSynonymous;!;!;nonSynonymous	missense_variant	TRUE
chr16:3779300C>G	chr16	3779300	SNP	0	G	exonic;exonic	nonSynonymous;nonSynonymous	missense_variant	TRUE
chr16:5128843C>G	chr16	5128843	SNP	0	G	exonic;exonic;exonic;exonic	nonSynonymous;nonSynonymous;nonSynonymous;nonSynonymous	missense_variant	TRUE
chr16:74808559C>T	chr16	74808559	SNP	0	T	exonic	nonSynonymous	missense_variant	TRUE
chr16:89574804C>A	chr16	89574804	SNP	0	A	UTR5;UTR5;UTR5	!	upstream_gene_variant	TRUE
chr16:89574826A>C	chr16	89574826	SNP	0	C	exonic;exonic;exonic	startLoss;startLoss;startLoss	initiator_codon_variant	TRUE
chr16:89574914G>GT	chr16	89574914	INS	0	+T	exonic;exonic;exonic|exonic;exonic;exonic	indel-frameshift;indel-frameshift;indel-frameshift|indel-frameshift;indel-frameshift;indel-frameshift	frameshift_variant	TRUE
chr16:89574916C>CGTC	chr16	89574916	INS	0	+GTC	exonic;exonic;exonic|exonic;exonic;exonic	indel-nonFrameshift;indel-nonFrameshift;indel-nonFrameshift|indel-nonFrameshift;indel-nonFrameshift;indel-nonFrameshift	disruptive_inframe_insertion	TRUE
chr16:89575009G>A	chr16	89575009	SNP	0	A	spliceDonor;spliceDonor;spliceDonor	!	splice_donor_variant&intron_variant	TRUE
chr16:89575040C>A	chr16	89575040	MULTIALLELIC	0	A	intronic;intronic;intronic	!	intron_variant	TRUE
chr16:89576896A>C	chr16	89576896	SNP	0	C	spliceAcceptor;spliceAcceptor;spliceAcceptor	!	splice_acceptor_variant&intron_variant	TRUE
chr16:89576930T>TA	chr16	89576930	MULTIALLELIC	0	+A	exonic;exonic;exonic|exonic;exonic;exonic	indel-frameshift;indel-frameshift;indel-frameshift|indel-frameshift;indel-frameshift;indel-frameshift	frameshift_variant	TRUE
chr16:89576931G>GTG	chr16	89576931	INS	0	+TG	exonic;exonic;exonic|exonic;exonic;exonic	indel-frameshift;indel-frameshift;indel-frameshift|indel-frameshift;indel-frameshift;indel-frameshift	frameshift_variant	TRUE
chr16:89598368CGGCCCCCCCGGCTGTGGGAAGACGCT>C	chr16	89598369	DEL	0	-26	exonic;exonic;exonic|exonic;exonic;exonic|exonic;exonic;exonic|exonic;exonic;exonic|exonic;exonic;exonic|exonic;exonic;exonic|exonic;exonic;exonic|exonic;exonic;exonic|exonic;exonic;exonic|exonic;exonic;exonic|exonic;exonic;exonic|exonic;exonic;exonic|exonic;exonic;exonic|exonic;exonic;exonic|exonic;exonic;exonic|exonic;exonic;exonic|exonic;exonic;exonic|exonic;exonic;exonic|exonic;exonic;exonic|…	indel-frameshift;indel-frameshift;indel-frameshift|indel-frameshift;indel-frameshift;indel-frameshift|indel-frameshift;indel-frameshift;indel-frameshift|indel-frameshift;indel-frameshift;indel-frameshift|indel-frameshift;indel-frameshift;indel-frameshift|indel-frameshift;indel-frameshift;indel-frameshift|indel-frameshift;indel-frameshift;indel-frameshift|indel-frameshift;indel-frameshift;indel-fr…	frameshift_variant	TRUE
chr16:89613145C>T	chr16	89613145	SNP	0	T	exonic;exonic	nonSynonymous;nonSynonymous	missense_variant	TRUE
chr17:7578194GCAC>G	chr17	7578195	DEL	0	-3	exonic;exonic;exonic;exonic;exonic;exonic;exonic;exonic;exonic;exonic;exonic;exonic;exonic;exonic;exonic;exonic;exonic;exonic;exonic|exonic;exonic;exonic;exonic;exonic;exonic;exonic;exonic;exonic;exonic;exonic;exonic;exonic;exonic;exonic;exonic;exonic;exonic;exonic|exonic;exonic;exonic;exonic;exonic;exonic;exonic;exonic;exonic;exonic;exonic;exonic;exonic;exonic;exonic;exonic;exonic;exonic;exonic	indel-nonFrameshift;indel-nonFrameshift;indel-nonFrameshift;indel-nonFrameshift;indel-nonFrameshift;indel-nonFrameshift;indel-nonFrameshift;indel-nonFrameshift;indel-nonFrameshift;indel-nonFrameshift;indel-nonFrameshift;indel-nonFrameshift;indel-nonFrameshift;indel-nonFrameshift;indel-nonFrameshift;indel-nonFrameshift;indel-nonFrameshift;indel-nonFrameshift;indel-nonFrameshift|indel-nonFrameshift…	inframe_deletion	TRUE
chr17:7578523T>TG	chr17	7578523	INS	0	+G	exonic;exonic;exonic;exonic;exonic;UTR5;exonic;exonic;UTR5;UTR5;exonic;exonic;exonic;exonic;exonic;exonic;exonic;exonic;exonic|exonic;exonic;exonic;exonic;exonic;UTR5;exonic;exonic;UTR5;UTR5;exonic;exonic;exonic;exonic;exonic;exonic;exonic;exonic;exonic	indel-frameshift;indel-frameshift;indel-frameshift;indel-frameshift;indel-frameshift;!;indel-frameshift;indel-frameshift;!;!;indel-frameshift;indel-frameshift;indel-frameshift;indel-frameshift;indel-frameshift;indel-frameshift;indel-frameshift;indel-frameshift;indel-frameshift|indel-frameshift;indel-frameshift;indel-frameshift;indel-frameshift;indel-frameshift;!;indel-frameshift;indel-frameshift;…	frameshift_variant	TRUE
chr17:17119692A>C	chr17	17119692	SNP	0	C	spliceDonor	!	splice_donor_variant&intron_variant	TRUE
chr17:41256884C>G	chr17	41256884	SNP	0	G	spliceDonor;spliceDonor;spliceDonor;spliceDonor;spliceDonor;spliceDonor;spliceDonor;spliceDonor;spliceDonor;spliceDonor;spliceDonor;spliceDonor;spliceDonor;spliceDonor;spliceDonor;spliceDonor;spliceDonor;spliceDonor	!	splice_donor_variant&intron_variant	TRUE
chr17:42991428C>A	chr17	42991428	SNP	0	A	exonic;exonic;exonic	stopGain;stopGain;stopGain	stop_gained	TRUE
chr17:48252809A>T	chr17	48252809	SNP	0	T	ncRNA;UTR3;UTR3	!	splice_region_variant	TRUE
chr17:62022709G>GTC	chr17	62022709	INS	0	+TC	intronic|intronic	!|!	intron_variant	TRUE
chr17:62022711C>CT	chr17	62022711	INS	0	+T	intronic|intronic	!|!	splice_region_variant&intron_variant	TRUE
chr17:62023005G>GGC	chr17	62023005	INS	0	+GC	intronic|intronic	!|!	splice_region_variant&intron_variant	TRUE
chr17:62023006C>A	chr17	62023006	SNP	0	A	intronic	!	splice_region_variant&intron_variant	TRUE
chr17:62034787G>A	chr17	62034787	SNP	0	A	exonic	nonSynonymous	missense_variant	TRUE
chr18:24128261GTCCTCC>G	chr18	24128262	DEL	0	-6	exonic;intronic;intronic;intronic;intronic|exonic;intronic;intronic;intronic;intronic|exonic;intronic;intronic;intronic;intronic|exonic;intronic;intronic;intronic;intronic|exonic;intronic;intronic;intronic;intronic|exonic;intronic;intronic;intronic;intronic	indel-nonFrameshift;!;!;!;!|indel-nonFrameshift;!;!;!;!|indel-nonFrameshift;!;!;!;!|indel-nonFrameshift;!;!;!;!|indel-nonFrameshift;!;!;!;!|indel-nonFrameshift;!;!;!;!	disruptive_inframe_deletion	TRUE
chr19:15291774G>A	chr19	15291774	SNP	0	A	exonic;exonic	stopGain;stopGain	stop_gained&splice_region_variant	TRUE
chr19:15311794A>G	chr19	15311794	SNP	0	G	intergenic	!	upstream_gene_variant	TRUE
chr19:39076592G>A	chr19	39076592	SNP	0	A	exonic;exonic	nonSynonymous;nonSynonymous	missense_variant	TRUE
chr19:41123094G>GG	chr19	41123094	INS	0	+G	exonic;exonic;exonic;exonic;exonic|exonic;exonic;exonic;exonic;exonic	indel-frameshift;indel-frameshift;indel-frameshift;indel-frameshift;indel-frameshift|indel-frameshift;indel-frameshift;indel-frameshift;indel-frameshift;indel-frameshift	frameshift_variant	TRUE
chr2:50149352T>C	chr2	50149352	SNP	0	C	exonic;exonic;exonic;exonic;exonic;exonic;exonic;exonic;exonic;exonic;exonic;exonic;exonic;exonic;exonic;exonic;exonic;exonic;exonic;exonic;exonic;exonic;exonic;exonic;exonic;exonic	synonymous;synonymous;synonymous;synonymous;synonymous;synonymous;synonymous;synonymous;synonymous;synonymous;synonymous;synonymous;synonymous;synonymous;synonymous;synonymous;synonymous;synonymous;synonymous;synonymous;synonymous;synonymous;synonymous;synonymous;synonymous;synonymous	synonymous_variant	TRUE
chr2:50847195G>A	chr2	50847195	SNP	0	A	exonic;exonic;exonic;exonic;exonic;exonic;exonic;exonic;exonic;exonic;exonic;exonic;exonic;exonic;exonic;exonic;exonic;exonic;exonic	nonSynonymous;nonSynonymous;nonSynonymous;nonSynonymous;nonSynonymous;nonSynonymous;nonSynonymous;nonSynonymous;nonSynonymous;nonSynonymous;nonSynonymous;nonSynonymous;nonSynonymous;nonSynonymous;nonSynonymous;nonSynonymous;nonSynonymous;nonSynonymous;nonSynonymous	missense_variant	TRUE
chr2:71825797C>G	chr2	71825797	SNP	0	G	exonic;exonic;exonic;exonic;exonic;exonic;exonic;exonic;exonic;exonic;exonic;exonic;exonic;exonic;exonic;exonic	nonSynonymous;nonSynonymous;nonSynonymous;nonSynonymous;nonSynonymous;nonSynonymous;nonSynonymous;nonSynonymous;nonSynonymous;nonSynonymous;nonSynonymous;nonSynonymous;nonSynonymous;nonSynonymous;nonSynonymous;nonSynonymous	missense_variant	TRUE
chr2:166179712G>C	chr2	166179712	SNP	0	C	exonic;exonic;exonic	nonSynonymous;nonSynonymous;nonSynonymous	missense_variant	TRUE
chr2:166183371A>G	chr2	166183371	SNP	0	G	exonic;exonic;exonic	nonSynonymous;nonSynonymous;nonSynonymous	missense_variant	TRUE
chr2:166929891CCAGGTCCT>C	chr2	166929892	DEL	0	-8	exonic;exonic;exonic;exonic|exonic;exonic;exonic;exonic|exonic;exonic;exonic;exonic|exonic;exonic;exonic;exonic|exonic;exonic;exonic;exonic|exonic;exonic;exonic;exonic|exonic;exonic;exonic;exonic|exonic;exonic;exonic;exonic	indel-frameshift;indel-frameshift;indel-frameshift;indel-frameshift|indel-frameshift;indel-frameshift;indel-frameshift;indel-frameshift|indel-frameshift;indel-frameshift;indel-frameshift;indel-frameshift|indel-frameshift;indel-frameshift;indel-frameshift;indel-frameshift|indel-frameshift;indel-frameshift;indel-frameshift;indel-frameshift|indel-frameshift;indel-frameshift;indel-frameshift;indel-fr…	frameshift_variant	TRUE
chr2:179393504G>T	chr2	179393504	SNP	0	T	intronic;intronic;intronic;exonic;exonic;exonic;exonic;exonic;exonic	!;!;!;nonSynonymous;nonSynonymous;nonSynonymous;nonSynonymous;nonSynonymous;nonSynonymous	missense_variant	TRUE
chr2:185803444TGCAGCTGCTGCAGCTGCAGCTGCA>T	chr2	185803445	DEL	0	-24	exonic|exonic|exonic|exonic|exonic|exonic|exonic|exonic|exonic|exonic|exonic|exonic|exonic|exonic|exonic|exonic|exonic|exonic|exonic|exonic|exonic|exonic|exonic|exonic	indel-nonFrameshift|indel-nonFrameshift|indel-nonFrameshift|indel-nonFrameshift|indel-nonFrameshift|indel-nonFrameshift|indel-nonFrameshift|indel-nonFrameshift|indel-nonFrameshift|indel-nonFrameshift|indel-nonFrameshift|indel-nonFrameshift|indel-nonFrameshift|indel-nonFrameshift|indel-nonFrameshift|indel-nonFrameshift|indel-nonFrameshift|indel-nonFrameshift|indel-nonFrameshift|indel-nonFrameshift…	disruptive_inframe_deletion	TRUE
chr2:201950249G>T	chr2	201950249	SNP	0	T	exonic;exonic	stopGain;stopGain	stop_gained	TRUE
chr2:238268730C>A	chr2	238268730	SNP	0	A	spliceDonor;spliceDonor;spliceDonor	!	splice_donor_variant&intron_variant	TRUE
chr21:43897396C>T	chr21	43897396	SNP	0	T	intronic;intronic	!	splice_region_variant&intron_variant	TRUE
chr22:30064360G>GCGACGC	chr22	30064360	INS	0	+CGACGC	exonic;exonic;exonic;exonic;exonic;intronic;intronic;exonic;exonic;exonic;exonic|exonic;exonic;exonic;exonic;exonic;intronic;intronic;exonic;exonic;exonic;exonic	indel-nonFrameshift;indel-nonFrameshift;indel-nonFrameshift;indel-nonFrameshift;indel-nonFrameshift;!;!;indel-nonFrameshift;indel-nonFrameshift;indel-nonFrameshift;indel-nonFrameshift|indel-nonFrameshift;indel-nonFrameshift;indel-nonFrameshift;indel-nonFrameshift;indel-nonFrameshift;!;!;indel-nonFrameshift;indel-nonFrameshift;indel-nonFrameshift;indel-nonFrameshift	inframe_insertion	TRUE
chr3:50402127T>G	chr3	50402127	SNP	0	G	intronic;exonic;exonic;exonic;exonic	!;nonSynonymous;nonSynonymous;nonSynonymous;nonSynonymous	missense_variant	TRUE
chr3:50402890G>A	chr3	50402890	SNP	0	A	intronic;exonic;exonic;exonic;exonic;ncRNA;ncRNA	!;nonSynonymous;nonSynonymous;nonSynonymous;nonSynonymous;!;!	missense_variant	TRUE
chr3:57851007AG>A	chr3	57851008	DEL	0	-1	intronic;intronic;intronic;intronic;intronic;intronic;intronic;intronic;intronic;intronic;intronic;intronic	!	intron_variant	TRUE
chr3:122003832G>C	chr3	122003832	SNP	0	C	exonic;exonic	nonSynonymous;nonSynonymous	missense_variant	TRUE
chr4:153332910C>CAGG	chr4	153332910	INS	0	+AGG	exonic;exonic;exonic;exonic;exonic;exonic;exonic;exonic;exonic;exonic|exonic;exonic;exonic;exonic;exonic;exonic;exonic;exonic;exonic;exonic	indel-nonFrameshift;indel-nonFrameshift;indel-nonFrameshift;indel-nonFrameshift;indel-nonFrameshift;indel-nonFrameshift;indel-nonFrameshift;indel-nonFrameshift;indel-nonFrameshift;indel-nonFrameshift|indel-nonFrameshift;indel-nonFrameshift;indel-nonFrameshift;indel-nonFrameshift;indel-nonFrameshift;indel-nonFrameshift;indel-nonFrameshift;indel-nonFrameshift;indel-nonFrameshift;indel-nonFrameshift	inframe_insertion	TRUE
chr5:1295183G>A	chr5	1295183	SNP	0	A	intergenic	!	upstream_gene_variant	TRUE
chr5:77396835TTTC>T	chr5	77396836	DEL	0	-3	exonic;exonic|exonic;exonic|exonic;exonic	indel-nonFrameshift;indel-nonFrameshift|indel-nonFrameshift;indel-nonFrameshift|indel-nonFrameshift;indel-nonFrameshift	disruptive_inframe_deletion	TRUE
chr5:118811422GGTGA>G	chr5	118811423	DEL	0	-4	spliceDonor;spliceDonor;spliceDonor;spliceDonor;spliceDonor;spliceDonor|spliceDonor;spliceDonor;spliceDonor;spliceDonor;spliceDonor;spliceDonor|intronic;intronic;intronic;intronic;intronic;intronic|intronic;intronic;intronic;intronic;intronic;intronic	!|!|!|!	splice_donor_variant&splice_region_variant&intron_variant	TRUE
chr5:131705587CG>C	chr5	131705588	DEL	0	-1	ncRNA;UTR5;UTR5;UTR5	!	5_prime_UTR_variant	TRUE
chr5:148406482T>C	chr5	148406482	SNP	0	C	exonic;exonic;exonic	nonSynonymous;nonSynonymous;nonSynonymous	missense_variant	TRUE
chr6:110036337T>TCAG	chr6	110036337	INS	0	+CAG	exonic|exonic	indel-nonFrameshift|indel-nonFrameshift	inframe_insertion	TRUE
chr6:110036337TGAT>T	chr6	110036338	DEL	0	-3	exonic|exonic|exonic	indel-nonFrameshift|indel-nonFrameshift|indel-nonFrameshift	inframe_deletion	TRUE
chr6:152651802C>A	chr6	152651802	SNP	0	A	exonic;exonic;exonic	nonSynonymous;nonSynonymous;nonSynonymous	missense_variant	TRUE
chr7:6026775T>C	chr7	6026775	SNP	0	C	exonic;exonic;exonic;exonic;ncRNA;exonic;exonic;exonic;exonic;exonic;exonic;exonic;exonic;exonic;exonic;exonic	nonSynonymous;nonSynonymous;nonSynonymous;nonSynonymous;!;nonSynonymous;nonSynonymous;nonSynonymous;nonSynonymous;nonSynonymous;nonSynonymous;nonSynonymous;nonSynonymous;nonSynonymous;nonSynonymous;nonSynonymous	missense_variant	TRUE
chr7:55242465GGAATTAAGAGAAGCA>G	chr7	55242466	DEL	0	-15	exonic;exonic;exonic;exonic;exonic;exonic;exonic;exonic|exonic;exonic;exonic;exonic;exonic;exonic;exonic;exonic|exonic;exonic;exonic;exonic;exonic;exonic;exonic;exonic|exonic;exonic;exonic;exonic;exonic;exonic;exonic;exonic|exonic;exonic;exonic;exonic;exonic;exonic;exonic;exonic|exonic;exonic;exonic;exonic;exonic;exonic;exonic;exonic|exonic;exonic;exonic;exonic;exonic;exonic;exonic;exonic|exonic;…	indel-nonFrameshift;indel-nonFrameshift;indel-nonFrameshift;indel-nonFrameshift;indel-nonFrameshift;indel-nonFrameshift;indel-nonFrameshift;indel-nonFrameshift|indel-nonFrameshift;indel-nonFrameshift;indel-nonFrameshift;indel-nonFrameshift;indel-nonFrameshift;indel-nonFrameshift;indel-nonFrameshift;indel-nonFrameshift|indel-nonFrameshift;indel-nonFrameshift;indel-nonFrameshift;indel-nonFrameshift…	inframe_deletion	TRUE
chr7:55248980C>CTCCAGGAAGCCT	chr7	55248992	INS	0	+TCCAGGAAGCCT	exonic;exonic;exonic;exonic;exonic;exonic;exonic;exonic;ncRNA|exonic;exonic;exonic;exonic;exonic;exonic;exonic;exonic;ncRNA	indel-nonFrameshift;indel-nonFrameshift;indel-nonFrameshift;indel-nonFrameshift;indel-nonFrameshift;indel-nonFrameshift;indel-nonFrameshift;indel-nonFrameshift;!|indel-nonFrameshift;indel-nonFrameshift;indel-nonFrameshift;indel-nonFrameshift;indel-nonFrameshift;indel-nonFrameshift;indel-nonFrameshift;indel-nonFrameshift;!	disruptive_inframe_insertion	TRUE
chr7:75932111C>A	chr7	75932111	SNP	0	A	exonic	nonSynonymous	missense_variant	TRUE
chr7:91652178A>AAAC	chr7	91652178	INS	0	+AAC	exonic;exonic;exonic;exonic;exonic|exonic;exonic;exonic;exonic;exonic	indel-nonFrameshift;indel-nonFrameshift;indel-nonFrameshift;indel-nonFrameshift;indel-nonFrameshift|indel-nonFrameshift;indel-nonFrameshift;indel-nonFrameshift;indel-nonFrameshift;indel-nonFrameshift	disruptive_inframe_insertion	TRUE
chr7:117199644ATCT>A	chr7	117199645	DEL	0	-3	exonic|exonic|exonic	indel-nonFrameshift|indel-nonFrameshift|indel-nonFrameshift	disruptive_inframe_deletion	TRUE
chr7:140453136AC>CT	chr7	140453136	MNP	0	C	exonic	nonSynonymous	missense_variant	TRUE
chr7:140453136AC>CT	chr7	140453137	MNP	0	T	exonic	nonSynonymous	missense_variant	TRUE
chr7:140453136A>C	chr7	140453136	SNP	0	T	exonic	nonSynonymous	missense_variant	TRUE
chr7:140453137C>T	chr7	140453137	SNP	0	T	exonic	nonSynonymous	missense_variant	TRUE
chr7:143013488A>T	chr7	143013488	SNP	0	T	intronic;intronic;intronic	!	splice_region_variant&intron_variant	TRUE
chr7:143018934G>A	chr7	143018934	SNP	0	A	exonic;exonic;ncRNA	nonSynonymous;nonSynonymous;!	missense_variant	TRUE
chr7:143048771C>T	chr7	143048771	SNP	0	T	exonic;exonic;ncRNA	stopGain;stopGain;!	stop_gained	TRUE
chr8:1871951C>T	chr8	1871951	SNP	0	T	exonic;exonic;exonic;exonic;exonic;exonic;exonic;exonic	nonSynonymous;nonSynonymous;nonSynonymous;nonSynonymous;nonSynonymous;nonSynonymous;nonSynonymous;nonSynonymous	missense_variant	TRUE
